# Supplementary material for: Physiologically Based Pharmacokinetic Modeling of Extracellular Vesicles
Source: MDPI journal article supplement (doi:10.3390/biology12091178), 2023-08-29
Supplement: s1 [file s1]

## **Supplementary Information**

### **Physiologically Based Pharmacokinetic Modeling of Extracellular Vesicles**

**Prashant Kumar <sup>1,\*</sup>, Darshan Mehta <sup>1</sup> and John J. Bissler <sup>2</sup>**

<sup>1</sup> Division of Biochemical Toxicology, National Center for Toxicological Research,  
United States Food and Drug Administration, Jefferson, AR 72079, USA;  
darshan.mehta@fda.hhs.gov

<sup>2</sup> Department of Pediatrics, Division of Pediatrics Nephrology,  
University of Tennessee Health Science Center, Memphis, TN 38103, USA; jbissler@uthsc.edu

\* Correspondence: prashant.kumar@fda.hhs.gov

**Table S1.** List of completed or ongoing clinical trials related to Extracellular vesicles in various diseases condition.

| No.           | ClinicalTrials.gov Identifier | Name of trial                                                                            | status     | diseases                                                                                                                                                                                                              | EV source                                                                     | EV Purpose           | Location                                                 |
|---------------|-------------------------------|------------------------------------------------------------------------------------------|------------|-----------------------------------------------------------------------------------------------------------------------------------------------------------------------------------------------------------------------|-------------------------------------------------------------------------------|----------------------|----------------------------------------------------------|
| <b>Cancer</b> |                               |                                                                                          |            |                                                                                                                                                                                                                       |                                                                               |                      |                                                          |
| 1             | NCT04394572                   | Identification of New Diagnostic Protein Markers for Colorectal Cancer                   | Completed  | Colorectal Cancer                                                                                                                                                                                                     | Biological: Blood sample                                                      | Biomarker Diagnostic | Chu Reims Reims, France                                  |
| 2             | NCT04939324                   | Molecular Profiling of Exosomes in Tumor-draining Vein of Early-staged Lung Cancer       | Recruiting | Lung Cancer Exosomes Non-Small Cell Lung Cancer                                                                                                                                                                       | Biological: Blood samples at 2 sites: peripheral vein and tumor-draining vein | Diagnostic           | CHU de Limoges Limoges, France                           |
| 3             | NCT03608631                   | Exosomes in Treating Participants With Metastatic Pancreas Cancer With KrasG12D Mutation | Recruiting | <ul style="list-style-type: none"> <li>• KRAS NP_004976.2:p.G12D</li> <li>• Metastatic Pancreatic Adenocarcinoma</li> <li>• Pancreatic Ductal Adenocarcinoma</li> <li>• Stage IV Pancreatic Cancer AJCC v8</li> </ul> | Drug: Mesenchymal Stromal Cells-derived Exosomes with KRAS G12D siRNA)        | Therapeutics         | M D Anderson Cancer Center Houston, Texas, United States |
| 4             | NCT03830619                   | Serum Exosomal Long                                                                      | Completed  | Lung Cancer (Diagnosis)                                                                                                                                                                                               | Blood plasma                                                                  | Diagnostics          | Union Hospital,                                          |

|                    |             |                                                                                                                        |                            |                               |                                                                                                                                                  |              |                                                                                                    |
|--------------------|-------------|------------------------------------------------------------------------------------------------------------------------|----------------------------|-------------------------------|--------------------------------------------------------------------------------------------------------------------------------------------------|--------------|----------------------------------------------------------------------------------------------------|
|                    |             | Noncoding RNAs as Potential Biomarkers for Lung Cancer Diagnosis                                                       |                            |                               |                                                                                                                                                  |              | Tongji Medical College, Huazhong University of Science and Technology Wuhan, Hubei, China          |
| 5                  | NCT02977468 | Effects of MK-3475 (Pembrolizumab) on the Breast Tumor Microenvironment in Triple Negative Breast Cancer (Pembro/IORT) | Recruiting                 | Triple Negative Breast Cancer | <ul style="list-style-type: none"> <li>• Drug: Merck 3475 Pembrolizumab</li> <li>• Radiation: Intraoperative radiation therapy (IORT)</li> </ul> | Therapeutics | Columbia University Irving Medical Center New York, New York, United States                        |
| <b>Coronavirus</b> |             |                                                                                                                        |                            |                               |                                                                                                                                                  |              |                                                                                                    |
| 1.                 | NCT05216562 | Efficacy and Safety of EXOSOME-MSC Therapy to Reduce Hyperinflammation In Moderate COVID-19 Patients                   | Recruiting Phase 2 Phase 3 | SARS-CoV2 Infection           | - Drug: Exosome-MSC Intravenous injection<br>- Drug: Placebo Intravenous Injection<br>- Drug: COVID-19 Standard Treatment                        | Therapeutics | - RSPAD Gatot Soebroto Jakarta, DKI Jakarta, Indonesia<br>- RSUP Dr. M. Jamil Padang, West Sumatra |

|                                |                 |                                                                                                                                               |                                           |                                                      |                                                                                                      |                 |                                                                                                            |
|--------------------------------|-----------------|-----------------------------------------------------------------------------------------------------------------------------------------------|-------------------------------------------|------------------------------------------------------|------------------------------------------------------------------------------------------------------|-----------------|------------------------------------------------------------------------------------------------------------|
|                                |                 |                                                                                                                                               |                                           |                                                      |                                                                                                      |                 | ,<br>Indones<br>ia<br>- RSUP<br>Dr.<br>Sardjito<br>Yogyak<br>arta,<br>Indones<br>ia                        |
| 2.                             | NCT0474<br>7574 | Evaluation<br>of the<br>Safety of<br>CD24-<br>Exosomes<br>in Patients<br>With<br>COVID-<br>19<br>Infection                                    | Recru<br>iting<br>Phase<br>1              | SARS-CoV-2                                           | Drug:<br>EXO-<br>CD24                                                                                | Therapy         | Tel<br>Aviv<br>Medical<br>Center<br>Tel<br>Aviv,<br>Israel                                                 |
| 3.                             | NCT0449<br>1240 | Evaluation<br>of Safety<br>and<br>Efficiency<br>of Method<br>of<br>Exosome<br>Inhalation<br>in SARS-<br>CoV-2<br>Associated<br>Pneumoni<br>a. | Comp<br>leted<br>Phase<br>1<br>Phase<br>2 | - Covid19<br>- SARS-CoV-2<br>PNEUMONIA<br>- COVID-19 | - Drug:<br>EXO 1<br>inhalation<br>- Drug:<br>EXO 2<br>inhalation<br>- Drug:<br>Placebo<br>inhalation | Therapy         | Medical<br>Centre<br>Dinasty<br>Samara,<br>Russian<br>Federati<br>on                                       |
| <b>Cardiovascular Diseases</b> |                 |                                                                                                                                               |                                           |                                                      |                                                                                                      |                 |                                                                                                            |
| 1.                             | NCT0303<br>4265 | New<br>Biomarker<br>s and<br>Difficult-<br>to-treat<br>Hypertensi<br>on                                                                       | Comp<br>leted                             | Hypertension                                         | Urinary<br>exosomes                                                                                  | Diagnosti<br>cs | Depart<br>ment of<br>Nephrol<br>ogy and<br>Hyperte<br>nsion,<br>Inselspi<br>tal,<br>Bern<br>Univers<br>ity |

|    |                 |                                                                                              |                |                              |                                       |                                 |                                                                                                                                                                                                                                                |
|----|-----------------|----------------------------------------------------------------------------------------------|----------------|------------------------------|---------------------------------------|---------------------------------|------------------------------------------------------------------------------------------------------------------------------------------------------------------------------------------------------------------------------------------------|
|    |                 |                                                                                              |                |                              |                                       |                                 | Hospita<br>l<br>Bern,<br>Switzerl<br>and                                                                                                                                                                                                       |
| 2. | NCT0537<br>0105 | Extracellul<br>ar Vesicles<br>as Stroke<br>Biomarker<br>s                                    | Recru<br>iting | - Stroke<br>- Rehabilitation | Blood                                 | Diagnosti<br>cs                 | -<br>IRCCS<br>Don<br>Gnocch<br>i,<br>Fondazi<br>one<br>Don<br>Carlo<br>Gnocch<br>i<br>ONLUS<br>Florenc<br>e, Italy<br>-<br>IRCCS<br>S.<br>Maria<br>Nascent<br>e,<br>Fondazi<br>one<br>Don<br>Carlo<br>Gnocch<br>i<br>ONLUS<br>Milano,<br>Italy |
| 3. | NCT0347<br>8410 | Role of<br>Exosomes<br>Derived<br>From<br>Epicardial<br>Fat in<br>Atrial<br>Fibrillatio<br>n | Recru<br>iting | Atrial<br>Fibrillation       | Epicardial<br>fat derived<br>exosomes | Pathophy<br>siology<br>analysis | Sheba<br>medical<br>center<br>Ramat<br>Gan,<br>Israel                                                                                                                                                                                          |
| 4. | NCT0293<br>1045 | Antiplatele<br>t Therapy<br>Effect on                                                        | Comp<br>leted  | Myocardial<br>Infarction     | Platlets                              | Pathophy<br>siology<br>analysis | -<br>Laborat<br>ory of                                                                                                                                                                                                                         |

|  |  |                                                       |         |  |  |  |                                                                                                                                                                                                      |
|--|--|-------------------------------------------------------|---------|--|--|--|------------------------------------------------------------------------------------------------------------------------------------------------------------------------------------------------------|
|  |  | Extracellular Vesicles in Acute Myocardial Infarction | Phase 4 |  |  |  | Experimental Clinical Chemistry, Academic Medical Centre of the University of Amsterdam Amsterdam, Netherlands - 1st Chair and Department of Cardiology, Medical University of Warsaw Warsaw, Poland |
|--|--|-------------------------------------------------------|---------|--|--|--|------------------------------------------------------------------------------------------------------------------------------------------------------------------------------------------------------|

**Table S2.** A comparison between GastroPlus, Simcyp, PK-Sim and Berkely Madonna.

| Feature                 | GastroPlus                         | Simcyp                           | PK-Sim                           | Berkeley Madonna                   |
|-------------------------|------------------------------------|----------------------------------|----------------------------------|------------------------------------|
| Developer               | Simulations Plus                   | Certara                          | OPEN SYSTEMS PHARMACOLOGY        | University of California, Berkeley |
| Purpose                 | Predictive PK modeling             | PBPK modeling                    | PBPK modeling                    | Dynamic systems modeling           |
| Application             | Oral, IV, dermal, inhaled dosing   | Diverse routes of administration | Diverse routes of administration | Dynamic systems modeling           |
| Mechanistic Modeling    | Detailed mechanistic modeling      | Mechanistic and empirical models | Mechanistic and empirical models | Ordinary Differential Equations    |
| Integration             | In vitro, in vivo data integration | Incorporates clinical data       | Integrates clinical data         | Mathematical modeling              |
| Specialization          | Biopharmaceutics, formulation      | Drug-drug interactions           | Pediatrics, special populations  | General mathematical modeling      |
| Populations             | Adult, pediatric, special groups   | Wide range of populations        | Diverse populations              | General population                 |
| User-Friendly Interface | Graphical interface for modeling   | User-friendly interface          | Intuitive graphical interface    | Graphical interface for modeling   |
| Validation and Adoption | Widely adopted and validated       | Industry standard                | Widely accepted                  | Used in academia and research      |
| Licensing               | Commercial software                | Commercial software              | Commercial software              | Commercial software                |
